# Supplementary material
Source: Springer Nature journal article supplement (https://www.springermedizin.de/resource/supplementary/12958_2009_587_MOESM4_ESM.pdf/9568044)

**A**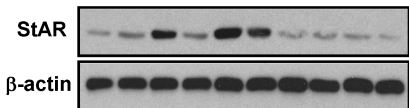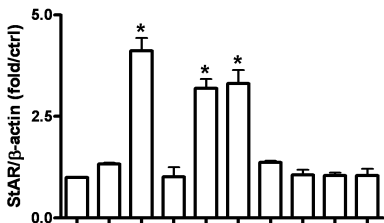

|                       |   |   |   |   |   |   |   |   |   |   |
|-----------------------|---|---|---|---|---|---|---|---|---|---|
| cAMP (1 mM)           | - | - | + | + | + | + | + | - | - | - |
| Leptin (1000 ng/ml)   | - | + | - | + | + | + | + | - | - | - |
| PD98059 (25 $\mu$ M)  | - | - | - | - | + | - | - | + | - | - |
| SB203580 (10 $\mu$ M) | - | - | - | - | - | + | - | - | + | - |
| SP600125 (25 $\mu$ M) | - | - | - | - | - | - | + | - | - | + |

**B**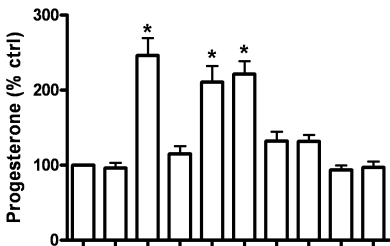

|                       |   |   |   |   |   |   |   |   |   |   |
|-----------------------|---|---|---|---|---|---|---|---|---|---|
| cAMP (1 mM)           | - | - | + | + | + | + | + | - | - | - |
| Leptin (1000 ng/ml)   | - | + | - | + | + | + | + | - | - | - |
| PD98059 (25 $\mu$ M)  | - | - | - | - | + | - | - | + | - | - |
| SB203580 (10 $\mu$ M) | - | - | - | - | - | + | - | - | + | - |
| SP600125 (25 $\mu$ M) | - | - | - | - | - | - | + | - | - | + |

Supplement: MOESM4 [file 9568044]
